# Supplementary material for: A radiomics model that predicts lymph node status in pancreatic cancer to guide clinical decision making: A retrospective study
Source: PubMed Central journal article supplement (PMC8425217; doi:10.7150/jca.61101), 2021-08-22
Supplement: jcav12p6050s1.pdf [file jcav12p6050s1.pdf]

## Supplementary File

**Title:** A radiomics model that predicts lymph node status in pancreatic cancer to guide clinical decision making: A retrospective study

**Authors:** Xiaoyuan Liang, Wei Cai, Xingyu Liu, Ming Jin, Lingxiang Ruan and Sheng Yan

**Table 1** radiomic features extracted, detail description for each feature refer <http://github.com/Radiomics/pyradiomics>

| Feature category | Feature list                                                                                                                                                                                                                                                                                                                                                                                                                                                                           |
|------------------|----------------------------------------------------------------------------------------------------------------------------------------------------------------------------------------------------------------------------------------------------------------------------------------------------------------------------------------------------------------------------------------------------------------------------------------------------------------------------------------|
| firstorder       | 10Percentile, 90Percentile, Energy, Entropy, InterquartileRange, Kurtosis, Maximum, Mean, MeanAbsoluteDeviation, Median, Minimum, Range, RobustMeanAbsoluteDeviation, RootMeanSquared, Skewness, TotalEnergy, Uniformity, Variance, log-sigma-1-0_Mean, log-sigma-1-0_Maximum, log-sigma-1-0_Median, log-sigma-1-0_Minimum, log-sigma-1-0_Energy, log-sigma-1-0_Entropy, log-sigma-1-0_Kurtosis, log-sigma-1-0_MeanAbsoluteDeviation, log-sigma-1-0_Skewness, log-sigma-1-0_Uniformity |
| Shape            | Flatness, LeastAxisLength, MajorAxisLength, Maximum2DDiameterColumn, Maximum2DDiameterRow, Maximum2DDiameterSlice, Maximum3DDiameter, MeshVolume, MinorAxisLength, Sphericity, SurfaceArea, SurfaceVolumeRatio, VoxelVolume                                                                                                                                                                                                                                                            |
| glcm             | glcm_Autocorrelation, glcm_ClusterProminence, glcm_ClusterShade, glcm_ClusterTendency, glcm_Contrast, glcm_Correlation, glcm_DifferenceAverage, glcm_DifferenceEntropy, glcm_DifferenceVariance, glcm_Id, glcm_Idm, glcm_Idmn, glcm_Idn, glcm_Imc1,                                                                                                                                                                                                                                    |

|       |                                                                                                                                                                                                                                                                                                                                                                                                                                                                                                                                                                     |
|-------|---------------------------------------------------------------------------------------------------------------------------------------------------------------------------------------------------------------------------------------------------------------------------------------------------------------------------------------------------------------------------------------------------------------------------------------------------------------------------------------------------------------------------------------------------------------------|
|       | <p>glcm_Imc2, glcm_InverseVariance, glcm_JointAverage,<br/> glcm_JointEnergy, glcm_JointEntropy, glcm_MCC,<br/> glcm_MaximumProbability, glcm_SumAverage,<br/> glcm_SumEntropy, glcm_SumSquares</p>                                                                                                                                                                                                                                                                                                                                                                 |
| gldm  | <p>gldm_DependenceEntropy,<br/> gldm_DependenceNonUniformity,<br/> gldm_DependenceNonUniformityNormalized,<br/> gldm_DependenceVariance,<br/> gldm_GrayLevelNonUniformity, gldm_GrayLevelVariance,<br/> gldm_HighGrayLevelEmphasis,<br/> gldm_LargeDependenceEmphasis,<br/> gldm_LargeDependenceHighGrayLevelEmphasis,<br/> gldm_LargeDependenceLowGrayLevelEmphasis,<br/> gldm_LowGrayLevelEmphasis,<br/> gldm_SmallDependenceEmphasis,<br/> gldm_SmallDependenceHighGrayLevelEmphasis,<br/> gldm_SmallDependenceLowGrayLevelEmphasis</p>                          |
| glrlm | <p>glrlm_GrayLevelNonUniformity,<br/> glrlm_GrayLevelNonUniformityNormalized,<br/> glrlm_GrayLevelVariance,<br/> glrlm_HighGrayLevelRunEmphasis,<br/> glrlm_LongRunEmphasis,<br/> glrlm_LongRunHighGrayLevelEmphasis,<br/> glrlm_LongRunLowGrayLevelEmphasis,<br/> glrlm_LowGrayLevelRunEmphasis, glrlm_RunEntropy,<br/> glrlm_RunLengthNonUniformity,<br/> glrlm_RunLengthNonUniformityNormalized,<br/> glrlm_RunPercentage, glrlm_RunVariance,<br/> glrlm_ShortRunEmphasis,<br/> glrlm_ShortRunHighGrayLevelEmphasis,<br/> glrlm_ShortRunLowGrayLevelEmphasis</p> |
| glszm | <p>glszm_GrayLevelNonUniformity,</p>                                                                                                                                                                                                                                                                                                                                                                                                                                                                                                                                |

|       |                                                                                                                                                                                                                                                                                                                                                                                                                                                                                                                  |
|-------|------------------------------------------------------------------------------------------------------------------------------------------------------------------------------------------------------------------------------------------------------------------------------------------------------------------------------------------------------------------------------------------------------------------------------------------------------------------------------------------------------------------|
|       | glszm_GrayLevelNonUniformityNormalized,<br>glszm_GrayLevelVariance,<br>glszm_HighGrayLevelZoneEmphasis,<br>glszm_LargeAreaEmphasis,<br>glszm_LargeAreaHighGrayLevelEmphasis,<br>glszm_LargeAreaLowGrayLevelEmphasis,<br>glszm_LowGrayLevelZoneEmphasis,<br>glszm_SizeZoneNonUniformity,<br>glszm_SizeZoneNonUniformityNormalized,<br>glszm_SmallAreaEmphasis,<br>glszm_SmallAreaHighGrayLevelEmphasis,<br>glszm_SmallAreaLowGrayLevelEmphasis,<br>glszm_ZoneEntropy, glszm_ZonePercentage,<br>glszm_ZoneVariance |
| ngtdm | ngtdm_Busyness, ngtdm_Coarseness, ngtdm_Complexity,<br>ngtdm_Contrast, ngtdm_Strength                                                                                                                                                                                                                                                                                                                                                                                                                            |
